# Supplementary material for: DELLA proteins are common components of symbiotic rhizobial and mycorrhizal signalling pathways
Source: PubMed Central journal article supplement (PMC4990646; doi:10.1038/ncomms12433), 2016-08-12
Supplement: ncomms12433-s1.pdf [file ncomms12433-s1.pdf]

1

## Supplementary Information:

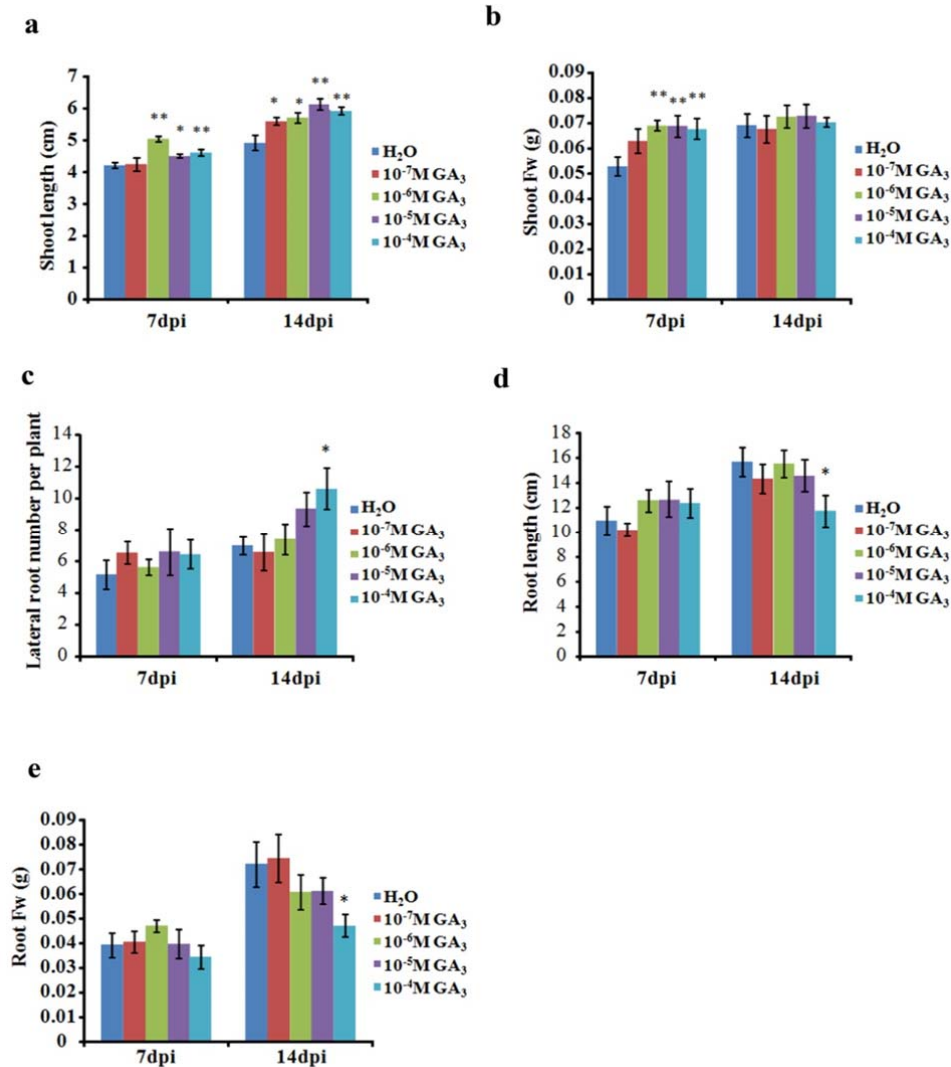

2

3 **Supplementary Figure 1: Developmental phenotypes of *M. truncatula* plants**  
4 **treated with GA<sub>3</sub> at different concentrations.**

5 Quantification of shoot length (a), shoot fresh weight (b), lateral root number (c), root  
6 length (d) and root fresh weight (e) of *M. truncatula* plants treated with GA<sub>3</sub> at  
7 different concentrations. Note that increasing GA<sub>3</sub> concentration promotes the shoot  
8 growth but doesn't affect the lateral root number and root growth. 10 plants were  
9 analyzed for each GA<sub>3</sub> concentration. Error bars represent standard deviation. The  
10 asterisk indicates a significant decrease relative to control (Student's *t*-test, \* *p* < 0.05;  
11 \*\* *p* < 0.01).

12

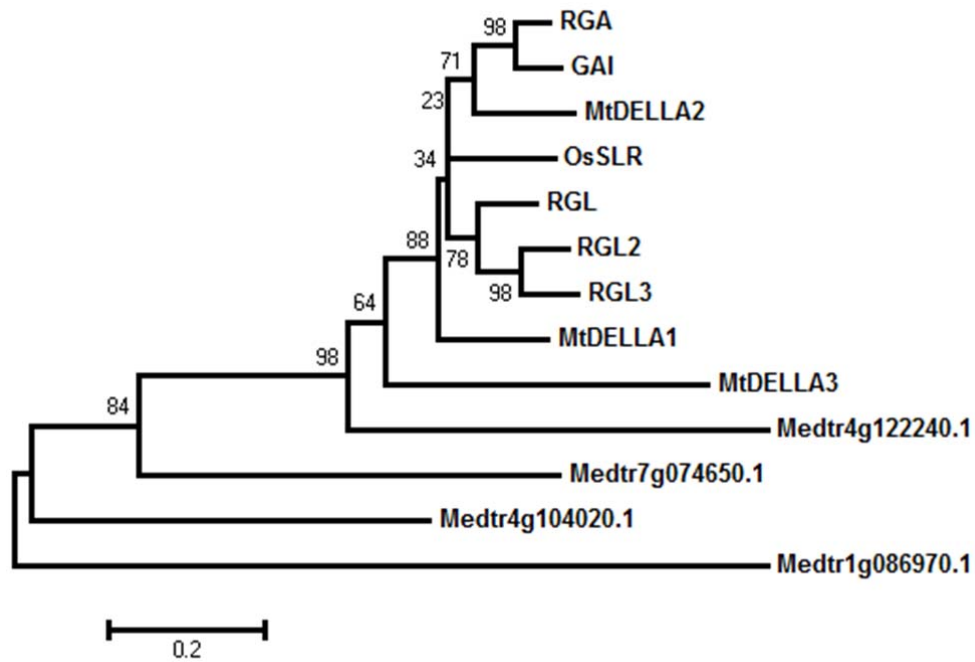

13

14 **Supplementary Figure 2: Phylogenetic Tree of MtDELLA proteins and the**  
15 **homologs in *Arabidopsis*, *Medicago* and rice (*Oryza sativa*).**

16 The evolutionary history was inferred using the Neighbor-Joining method. The  
17 percentage of replicate trees in which the associated taxa clustered together in the  
18 bootstrap test (1000 replicates) are shown next to the branches. The evolutionary  
19 distances were computed using the Poisson correction method and are in the units of  
20 the number of amino acid substitutions per site. Evolutionary analyses were  
21 conducted in MEGA6.

22

23

24

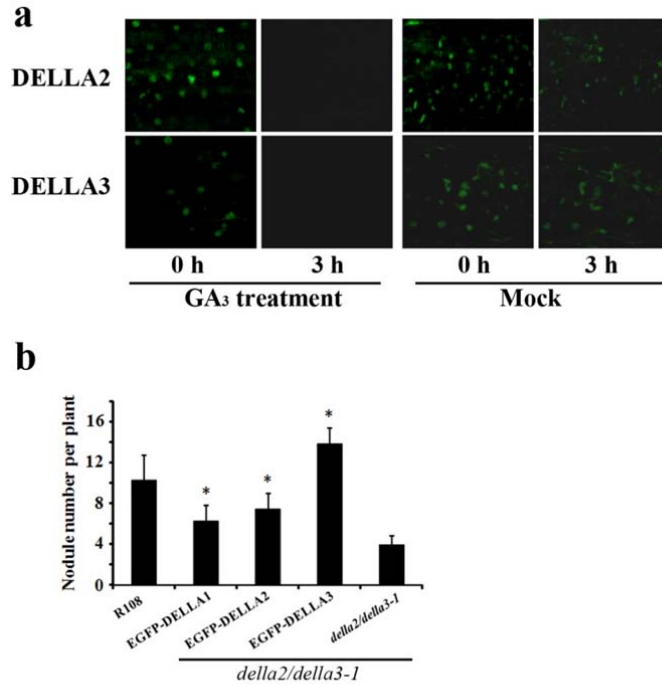

25

26 **Supplementary Figure 3: Genetic complementation of *della* mutant and GA<sub>3</sub>**  
 27 **promoted degradation of MtDELLA2, MtDELLA3 in the nucleus.**

28 (a) 3 hours treatment of 10<sup>-5</sup> M GA<sub>3</sub> caused degradation of MtDELLA2/3.  
 29 MtDELLA2-GFP and MtDELLA3-GFP fusion proteins of 14-day-old hairy root  
 30 transgenic plants treated with or without GA<sub>3</sub> (mock) were observed under a confocal  
 31 microscope. (b) *EGFP-DELLA1,2,3* can rescue the phenotype of *della2/della3* double  
 32 mutant. The roots expressing *MtDELLA1/2/3* were inoculated with *S.meliloti 1021*.  
 33 the nodules were counted 21 days post inoculation with *Sm1021*. n ≥ 9, where n  
 34 denotes the number of plants. Error bars represent standard division. The asterisk  
 35 indicates a significant increase relative to double mutant transformed with empty  
 36 vector (Student's *t*-test,\* p < 0.05).

37

38

39

40

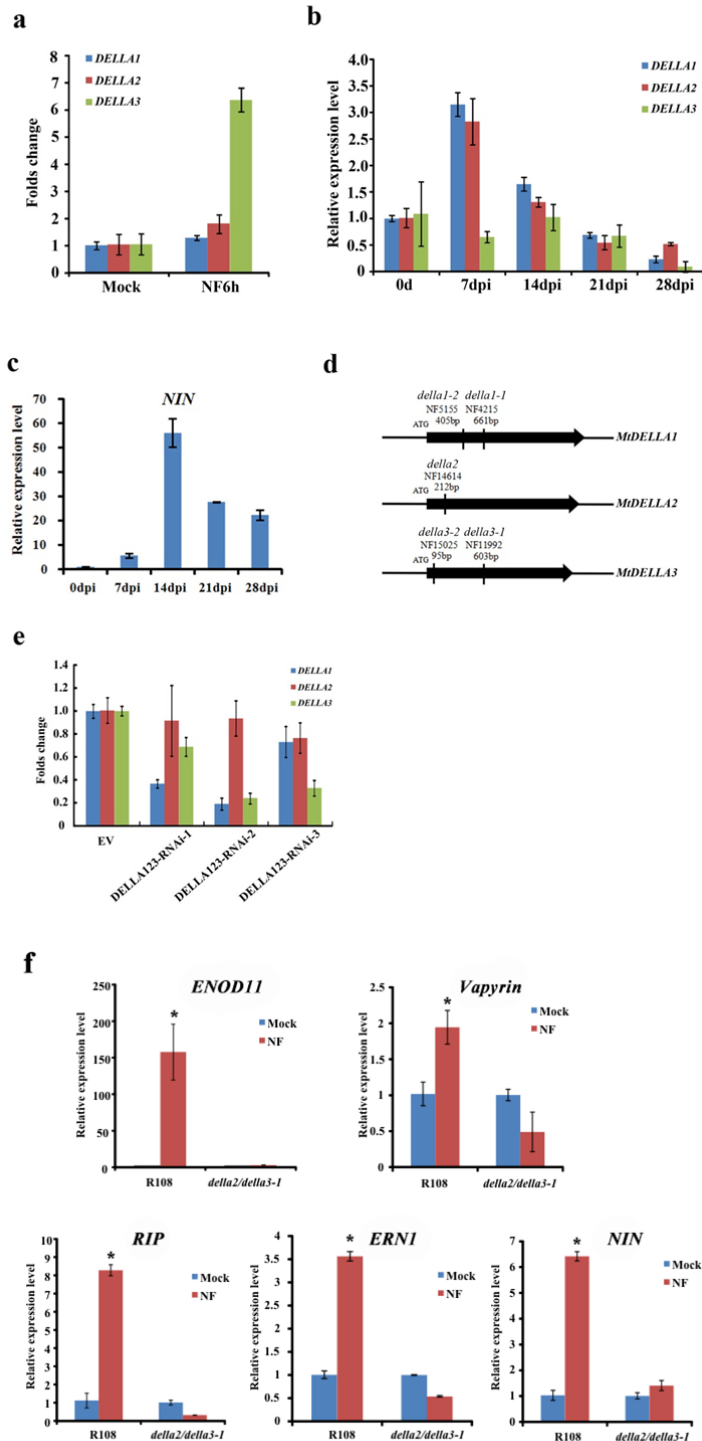

41

42

43 **Supplementary Figure 4: Expression of *MtDELLAs* and isolation of the *della***

44 **mutants**

45 (a) The relative expression of *MtDELLA1*, *MtDELLA2* and *MtDELLA3* six hours post  
46 Nod factor treatment. Expression levels were normalized against the reference gene  
47 *Elongation factor 1-alpha (EF1- $\alpha$ )*. (b) Time course of the relative expression of  
48 *MtDELLA1*, *MtDELLA2* and *MtDELLA3* upon inoculation with *Sm1021*. Note that  
49 the expression level of *MtDELLAs* was induced by *Sm1021* at early nodulation time  
50 point. (c) The expression level of *NIN* was also analyzed as a positive control, *NIN*  
51 was strongly induced during nodulation. Fold changes in expression level are shown  
52 relative to uninoculated roots at equivalent time points. Expression levels were  
53 normalized against the reference gene *Elongation factor 1-alpha (EF1- $\alpha$ )*. (d) The  
54 location of the *Tnt1* insertions in *MtDELLA1*, *MtDELLA2* and *MtDELLA3*. Black  
55 arrows indicate the coding regions. The vertical bars indicate the *Tnt1* insertion loci.  
56 (e) The expression level of *MtDELLA* genes in *MtDELLA* RNAi hairy transformed  
57 roots. 8 independent transgenic hairy roots were pooled for real-time PCR. Values of  
58 relative transcript levels are the mean of three technical replicates. Error bars  
59 represent standard deviation. (f) Real-time PCR results revealed that *MtDELLAs* required  
60 for induction of nodulin genes. 7-day-old *della2/della3* double mutants and R108 were treated  
61 with 1nM Nod factor or mock (BNM medium) for 6 hours. In wild type the nodulin genes  
62 were induced, however these genes could not be induced in *della2/della3* double mutants  
63 after Nod factor treatment. This is a replicate of Fig 3c-g.

64

65

66

67

68

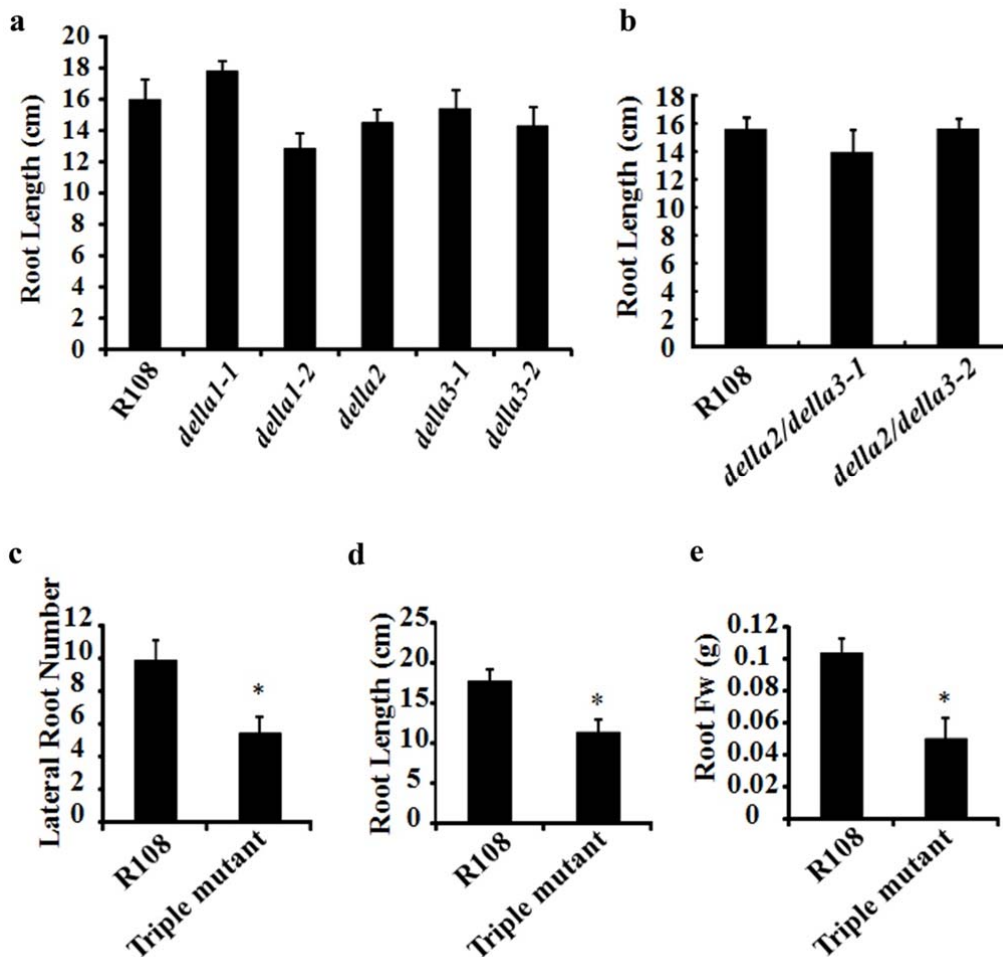

69

70 **Supplementary Figure 5: Developmental phenotypes of *della* single, double and**  
 71 **triple mutants**

72 (a) The quantification of root length of *della* single mutants and wild type (R108) at  
 73 21 days post inoculation (dpi).  $n \geq 8$  (b) The quantification of root length of *della*  
 74 double mutants and wild type at 21dpi.  $n \geq 8$ . (c-e) The phenotype of *della* triple  
 75 mutants. The lateral root number (c), root length (d), and root fresh weight (Fw) (e) of  
 76 *della* triple mutants were reduced compared to wild type at 21dpi.  $n \geq 12$ , where  $n$   
 77 denotes the number of plants. Error bars represent standard deviation. The asterisk  
 78 indicates a significant decrease with Student's *t*-test (\*'  $P < 0.05$ ).

79

80

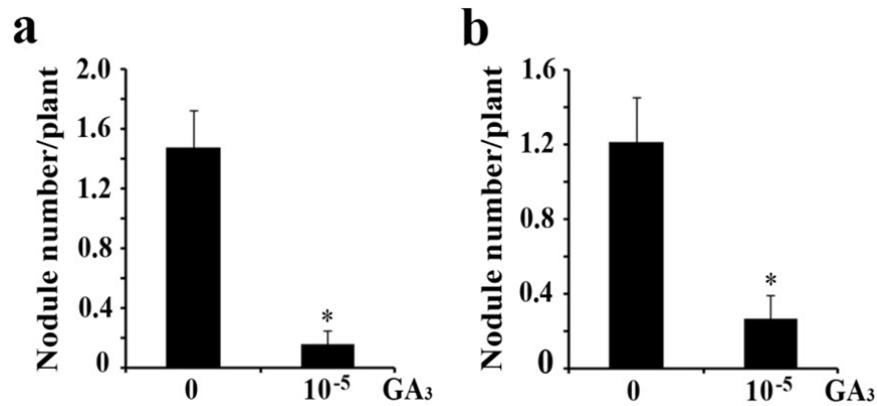

81

82

83 **Supplementary Figure 6:** The effect of GA<sub>3</sub> on spontaneous nodule formation.

84 (a) and (b) GA<sub>3</sub> inhibits spontaneous nodule formation induced by gain-of-function

85 CRE1 (a) and CCaMK1-311 (b). 20 hairy root transformed plants were assayed. Error

86 bars represent standard error. The asterisk indicates a significant decrease relative to

87 the control with Student's *t*-test ( $p < 0.01$ ). This is a representative experiment that

88 was repeated twice.

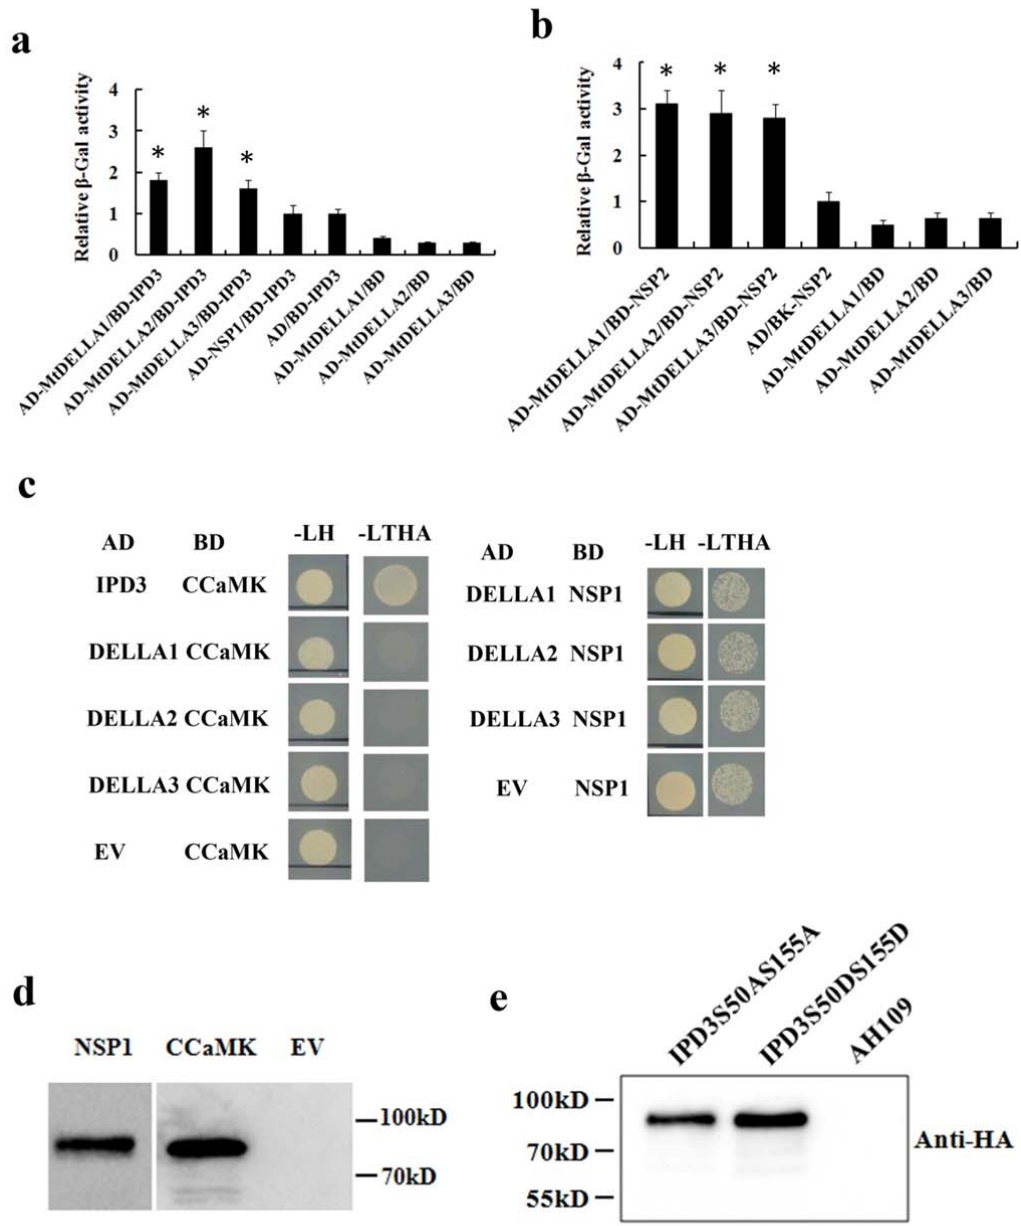

89

90 **Supplementary Figure 7: MtDELLAs can't interact with CCaMK and NSP1 in**  
 91 **yeast two-hybrid assay.**

92 Yeast two-hybrid assay showed MtDELLA proteins could interact with IPD3 (a) and  
 93 NSP2 (b). Data are presented as relative  $\beta$ -galactosidase activity. Error bars  
 94 represent standard deviation. The asterisk indicates a significant decrease with  
 95 Student's *t*-test (\*'  $P < 0.01$ ).

(c) No interaction was detected between MtDELLA



96 and CCaMK/NSP1 in yeast two-hybrid assays. SD/-Leu-Trp-Ade-His (-LTAH)  
97 medium with 30 mM 3-amino-1,2,4-triazole (3AT) was used for NSP1 interaction  
98 analysis. **(d)** Western blot analysis confirmed the expression of the fusion proteins in  
99 *S. cerevisiae*. Recombinant proteins were expressed from pGBKT7 contained a cMyc  
100 epitope and were detected by anti-cMyc monoclonal antibody. **(e)** Western blot  
101 analysis confirmed the expression of the fusion proteins in *S. cerevisiae*. Recombinant  
102 proteins were expressed from pGADT7 contained a HA tag and were detected by  
103 anti-HA antibody.

104

105

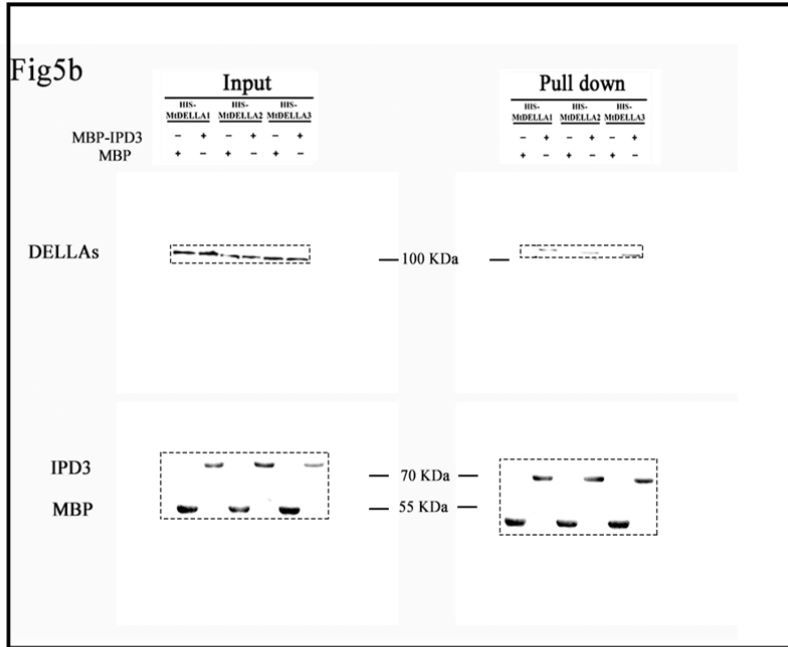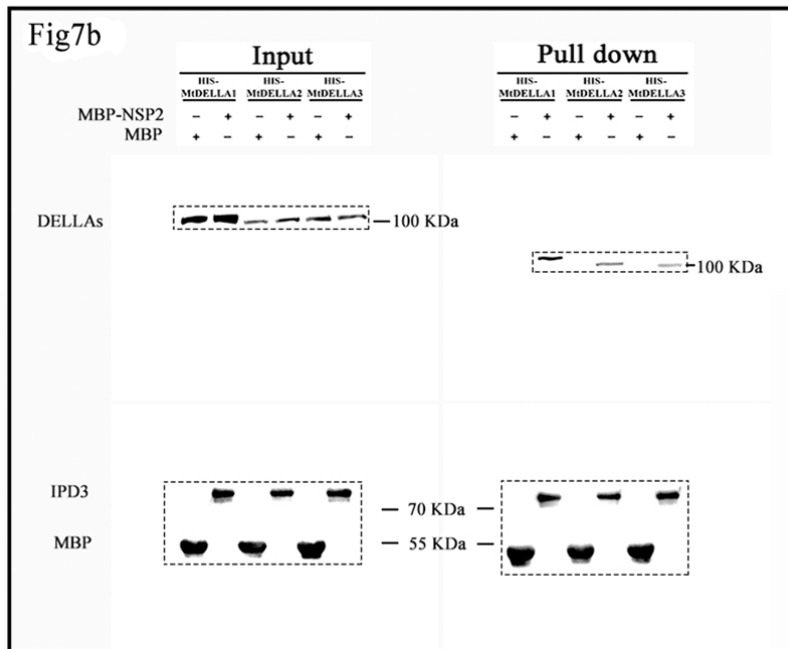

107

108 **Supplementary Figure 8A: Uncropped images of immunoblotting results in Fig5**

109 **and Fig7.**

110

111

112

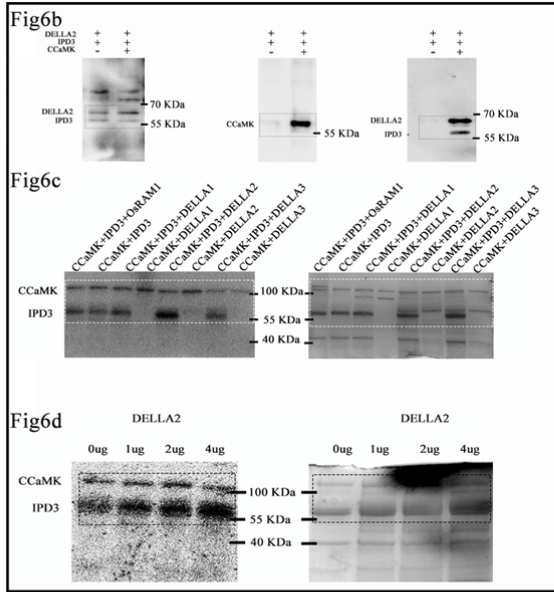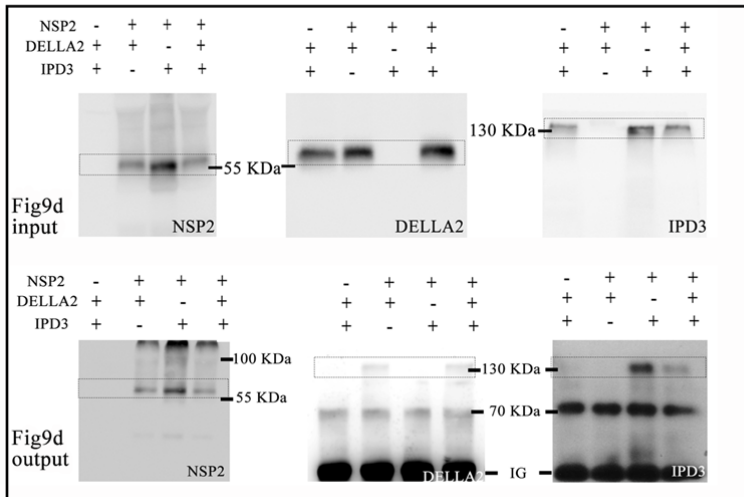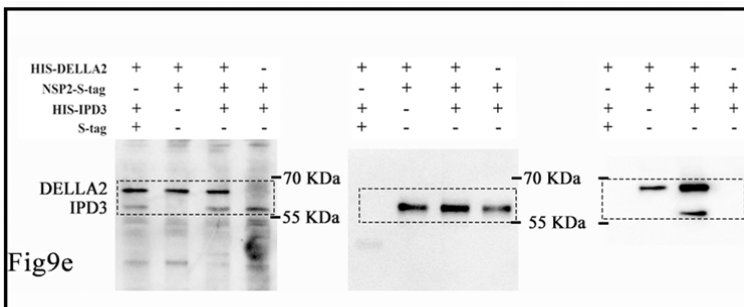

113

114

115 **Supplementary Figure 8B: Uncropped images of immunoblotting results in Fig6**

116 **and Fig9.**

117 **Supplementary Table 1: List of primers used in this study.**

|                               |                                |
|-------------------------------|--------------------------------|
| Primers used for genotyping   |                                |
| NF14614-F                     | CGGAATGCTGTGAAACACAC           |
| NF14614-R                     | GTATGGATGAACTCTTAGCTG          |
| NF4215-F                      | CAACTTTGGTGAATGTTTCATCA        |
| NF4215-R                      | CATAAGCGCAGGCCATTGCATC         |
| NF5155-F                      | CAACTTTGGTGAATGTTTCATCA        |
| NF5155-R                      | CATAAGCGCAGGCCATTGCATC         |
| NF11992-F                     | CGGATTCAGATCCGAGAAGACG         |
| NF11992-R                     | CAATGTCGGCTACAAAGTCCG          |
| NF15025-F                     | CGGATTCAGATCCGAGAAGACG         |
| NF15025-R                     | CAATGTCGGCTACAAAGTCCG          |
| Tnt1-R1                       | TGTAGCACCGAGATACGGTAATTAACAAGA |
| Primers used in real-time PCR |                                |
| NF14614-qF                    | AGGTGTTTGTGGGAAGACG            |
| NF14614-qR                    | GAAAGATGTTGAGCGATGG            |
| NF11992-qF                    | TGTTGGCAAACATGAACACA           |
| NF11992-qR                    | AGCTTGATTTGCGGTGAAAT           |
| NF15025-qF                    | CGGCTACAAAGTCCGATCAT           |
| NF15025-qR                    | TCCTCTCCGAATTTGACCAC           |
| NF4215-qF                     | AAGACCGGTGGTTCTTGTTG           |
| NF4215-qR                     | GCTTGTGCGAAATAGGAAGC           |
| NF5155-qF                     | GGGTTCAAACCATGCTCACT           |
| NF5155-qR                     | GCCGGTTCAGATTCTGGTT            |
| DELLA1-qF                     | CCAACTCGAACTCGACCGGG           |
| DELLA1-qR                     | CCAGCAAACAAAGCTAACAAAG         |
| DELLA2-qF                     | AGAATCTACGGTGTGTTTCC           |
| DELLA2-qR                     | TGCATCCCTTGATTAATCGA           |
| DELLA3-qF                     | ACGCTCCGTTAACGTTAGAT           |
| DELLA3-qR                     | CATTTCAATACCCGAATGAT           |
| NIN-qF                        | GCAATGTGGGATTTAGAGATT          |
| NIN-qR                        | GGAAGATTGAGAGGGGAAG            |
| ERN1-qF                       | GGAAGATGGTGCTGTTGCTT           |
| ERN1-qR                       | TGTTGGATTGTGAACCTGACTC         |
| FLOT4-qF                      | CTGAGGCAGTACGCGGACTTG          |
| FLOT4-qR                      | AGGTGGTAACATTCCCCTTTG          |
| RIP-qF                        | TAGGGAAAAACGCATTGGAG           |
| RIP-qR                        | ACAACAGGGCCTTTCATAC            |
| Vapyrin -qF                   | TCATCCTCCACAACAACAAGGT         |

|                              |                                        |
|------------------------------|----------------------------------------|
| Vapyrin -qR                  | TCAAGCACTTCTCTTATGTCATCCATTG           |
| MtENDO11-qF                  | TTCTTGTAAGTAGGTTAGTGTT                 |
| MtENDO11-qR                  | GAGGCTTGTAAGTAGGAGGAGGC                |
| ENOD40-qF                    | CAATCACTCTATCTATGTAGCACTG              |
| ENOD40-qR                    | CTCAAAGGAAGACAACACCATC                 |
| Primers used in protoplast   |                                        |
| pERN1-AgeI-F                 | GGACCGGTGTCAAAAGCTACGTTAAGCC           |
| pERN1-BamHI-R                | CGGGATCCCACAAAGTTTTTCAAGAAATTG         |
| LUC-BamHI-F                  | CGGGATCC ATGGAAGACGCCAAAAACAT          |
| LUC-HindIII-R                | CCAAGCTT TTACAATTTGGACTTTCCGC          |
| NOS-HindIII-F                | CCCAAGCTT GTTTCTTAAGATTGAATCCT         |
| NOS-PstI-R                   | AACTGCAG CCCGATCTAGTAACATAGAT          |
| NSP1-EcoRI-F                 | GGAATTCGATGACTATGGAACCAAATCC           |
| NSP1-BamHI-R                 | CGGGATCCCTACTCTGGTTGTTTATCCA           |
| NSP2-SacI-F                  | CGAGCTCGCATGGATTTGATGGACATGGATG        |
| NSP2-Sall-R                  | ACGCGTCGACGCTATAAATCAGAATCTGAAGAAGAACA |
| DELLA1-NcoI-F                | CCCATGGATGAAGAGAGAACACCAAGA            |
| DELLA1- $\Delta$ TAA-SpeI-R  | GACTAGTCTTGGACTCATTTTGTGGAA            |
| DELLA2-NcoI-F                | CCCATGGATGAAGAGAGAGCATAAGCT            |
| DELLA2-SpeI-R( $\Delta$ TGA) | GACTAGT GTGCGAAACCACCACTGAGT           |
| DELLA3-NcoI-F                | CCCATGGATGGAAATAGTTTCAGATTC            |
| DELLA3-SpeI-R( $\Delta$ TGA) | GACTAGT ACAATCAAAACGCAGTGTTT           |
| asRed-SpeI-F                 | GACTAGTATGGCCTCCTCCTGAAGAA             |
| asRed-R                      | TTATCTAGATCCGGTGGATC                   |
| Primers used in RNAi         |                                        |
| DELLA1-RNAi-1-F              | CACCTTGTCTCAACCCCTTTTCTC               |
| DELLA1-RNAi-1-R              | TTCCACCGCCGGCGGTGGTG                   |
| DELLA1-RNAi-2-F              | CACCTGGTTTCCGTTCTTCCTT                 |
| DELLA1-RNAi-2-R              | AATCACACCCCCACCAAA                     |
| DELLA2-Fused RNAi-1-F        | CACCGTTCATTACAATCCCTCTG                |
| DELLA2-Fused                 | TCAGCACAAGCCATCAAACCTATGA              |

|                          |                                                     |
|--------------------------|-----------------------------------------------------|
| RNAi-1-R                 |                                                     |
| DELLA3-Fused<br>RNAi-1-F | CGCTTCGGATACGGTCCACTA                               |
| DELLA3-Fused<br>RNAi-1-R | ATGTTTGCCAACAACCCTTGC                               |
| Primers used in<br>yeast |                                                     |
| CCaMK-Small-F            | TTTCCCGGAATGGGATATGGAACAAGAAACTCT                   |
| CCaMK-PstI-R             | TTTCTGCAGTTATGGACGAATAGAAGAGAGAACTACA               |
| CCaMKT271D-F             | AGTTTTTATGAGAAGGATTGGAAGGGAATTTCA                   |
| CCaMKT271D-R             | TGAAATTCCTTCCAATCCTTCTCATAAAAACT                    |
| CCaMK-NotI-F             | TTTGCGGCCGCAATGGGATATGGAACAAGAAACTCT                |
| CCaMK-BglII-R            | TTTAGATCTTTATGGACGAATAGAAGAGAGAACTACA               |
| DELLA1-NotI-F            | TTTGCGGCCGCAATGAAGAGAGAACACCAAGAAAG                 |
| DELLA1-BglII-R           | TTTAGATCTTCACTTGGACTCATTGTTGGAAGC                   |
| DELLA2-NotI-F            | TTTGCGGCCGCAATGAAGAGAGAGCATAAGCTTGAAC               |
| DELLA2-BglII-R           | TTTAGATCTTCACTGCGAAACCACCACTG                       |
| DELLA3-F                 | AAGAGAAAGGTGGCGGCCGCATGGAAATAGTTTCAGATT<br>CTTCTTCT |
| DELLA3-R                 | TCGGGCTAATGCGGCCGCTCAACAATCAAAACGCAGTGTT            |
| DELLA1-BamHI-F           | TCGGATCCAAATGAAGAGAGAACACCAAGAAAG                   |
| DELLA1-PstI-R            | TTCTGCAGTCACTTGGACTCATTGTTGGAAGC                    |
| DELLA2-EcoRI-F           | TGAATTCATGAAGAGAGAGCATAAGCTTGAAC                    |
| DELLA2-BamHI-<br>R       | TGGATCCTCAGTGCAGAAACCACCACTG                        |
| DELLA3-EcoRI-F           | TGAATTCATGGAAATAGTTTCAGATTCTTCTTCT                  |
| DELLA3-PstI-R            | TTTCACTGCAGAACAATCAAAACGCAGTGTT                     |
| Nsp2-EcoRI-F             | AAGAATTCATGGATTTGATGGACATGGATG                      |
| Nsp2-BamHI-R             | AAGGATCCCTATAAATCAGAATCTGAAGAAGAACA                 |
| IPD3S50D-F:              | AAGCTTTCGCACCGATGATGAAGAGCTTTTCAAAC                 |
| IPD3S50D-R:              | GTTTGAAAAGCTCTTCATCATCGGTGCGAAAGCTT                 |
| IPD3S50A-F:              | AAGCTTTCGCACCGATGCTGAAGAGCTTTTCAAAC                 |
| IPD3S50A-R:              | GTTTGAAAAGCTCTTCAGCATCGGTGCGAAAGCTT                 |
| IPD3S155D-F:             | TACAAGAAGCCGGGATTCTGAATTGCGGGCG                     |
| IPD3S155D-R:             | CGCCCGAATTCAGAATCCCGGCTTCTTGTA                      |
| IPD3S155A-F:             | TACAAGAAGCCGGGCATCTGAATTGCGGGCG                     |
| IPD3S155A-R:             | CGCCCGAATTCAGATGCCCGGCTTCTTGTA                      |
| IPD3-NotI-F              | TTTGCGGCCGCAATGGAAGGAGAGGATTTTCTG                   |
| IPD3-BglII-R             | TTTAGATCTTCAAATCTTCCAGTTCTGATAGAA                   |
| CCaMK-BamHI-F            | AAGGATCCATGGGATATGGAACAAGAAACTC                     |
| CCaMK-SacI-R             | AAGAGCTCTCAGGCTTCTCACCTTGACC                        |

|                                        |                                                                                                                             |
|----------------------------------------|-----------------------------------------------------------------------------------------------------------------------------|
| Primers used in BIFC                   |                                                                                                                             |
| DELLA1-SacI-F                          | AAGAGCTCAATGAAGAGAGAACACCAAGAAAG                                                                                            |
| DELLA1-KpnI-R                          | TTGGTACCACTTGGACTCATTGTTGGAAGC                                                                                              |
| DELLA2-SacI-F                          | AAGAGCTCAATGAAGAGAGAGCATAAGCTTGAAC                                                                                          |
| DELLA2-KpnI-R                          | TTGGTACCAGTGCGAAACCACCACTG                                                                                                  |
| DELLA3-SacI-F                          | AAGAGCTCAATGGAAATAGTTTCAGATTCTTCTCT                                                                                         |
| DELLA3-KpnI-R                          | TTGGTACCAACAATCAAAACGCAGTGTT                                                                                                |
| IPD3-SacI-F                            | AAGAGCTCAATGGAAGGGAGAGGATTTTCTG                                                                                             |
| IPD3-KpnI-R                            | AAGGATCCAAATCTTTCCAGTTTCTGATAGAA                                                                                            |
| NSP2-SacI-F                            | AAGAGCTCAATGGATTTGATGGACATGGATG                                                                                             |
| NSP2-KpnI-R                            | AAGGATCCATAAATCAGAATCTGAAGAAGAACA                                                                                           |
| Primers used in vivo/vitro experiments |                                                                                                                             |
| CCaMK-XbaI-F                           | AATCTAGAATGGGATATGGAACAAGAAAACCTC                                                                                           |
| CCaMK-PstI-R                           | AAACTGCAGTTATGGACGAATAGAAGAGAGAACTAC                                                                                        |
| IPD3-BamHI-F                           | TTGGATCCATGGAAGGGAGAGGATTTTCTG                                                                                              |
| IPD3-SalI-R                            | TTTGTCTGACTCAAATCTTTCCAGTTTCTGATAGAAT                                                                                       |
| OsRAM1-EcoRI-F                         | AAGAATTCATGGCCGGCGGCGGCGCAAGCTCC                                                                                            |
| OsRAM1-BamHI-R                         | AAGGATCCTCAGCACCGCCACGCGGAGGCGGCG                                                                                           |
| DELLA1-BamHI-F                         | TCGGATCCATGAAGAGAGAACACCAAGAAAG                                                                                             |
| DELLA1-SacI-R                          | TTGAGCTCTCACTTGGACTCATTGTTGGAAGC                                                                                            |
| DELLA2-BamHI-F                         | TCGGATCCATGAAGAGAGAGCATAAGCTTGAAC                                                                                           |
| DELLA2-SacI-R                          | TTGAGCTCTCAGTGCGAAACCACCACTG                                                                                                |
| DELLA3-EcoRI-F                         | AAGAATTCATGGAATAGTTTCAGATTCTTCTCT                                                                                           |
| DELLA3-SalI-R                          | AAAGTCGACTCAACAATCAAAACGCAGTGTT                                                                                             |
| CCaMK-BglII-F                          | TTTAGATCTAATGGGATATGGAACAAGAAAACCTCT                                                                                        |
| CCaMK-KpnI-R                           | TTTTCTCGAGTTATGGACGAATAGAAGAGAGAACTAC                                                                                       |
| NSP2-F                                 | GCTGACGTCGGTACCATGGATTTGATGGACATGGATG                                                                                       |
| NSP2-R                                 | AGACTCGAGGGTACCCTATAAATCAGAATCTGAAGAAGAACAAG                                                                                |
| NSP2-Flag-XbaI-F                       | GCTCTAGAACCATGGATTTGATGGACATGGATG                                                                                           |
| NSP2-Flag-KpnI-R                       | GGGGTACCTAAATCAGAATCTGAAGAAG                                                                                                |
| IPD3-HA-BamHI-F                        | TTGGATCCATGTACCCATACGATGTTCCAGATTACGCTTACCCATACG<br>ATGTTCCAGATTACGCTTACCCATACGATGTTCCAGATTACGCTATGG<br>AAGGGAGAGGATTTTCTGG |
| IPD3-HA-SacI-R                         | TTGAGCTCTCAAATCTTTCCAGTTTCTGATAGAAT                                                                                         |
| DELLA2-myc-F                           | CTACTAGTGGATCCGGTACCATGGAGGAGCAGAAGCTGA<br>TCTCAGAGGAGGACCTGAAGAGAGAGCATAAGCTTGAAC                                          |
| DELLA2-myc-R                           | TGGTCCTTATAGTCGGTACCGTCAGTGCGAAACCACCACTG                                                                                   |

|                                          |                                     |
|------------------------------------------|-------------------------------------|
| Primers used for promoter activity assay |                                     |
| pDELLA1-F                                | CACCGAGTATGCCAAAACACGATGAC          |
| pDELLA1-R                                | GTTGATTAAATTGGTGAAGTG               |
| pDELLA2-F                                | CACCGAGTATGCAGTCATAAAGTAC           |
| pDELLA2-R                                | CTTCACTTTTTCAGTTTTCTC               |
| pDELLA3-F                                | CACCCGTAATGCCTGAATCTCTACG           |
| pDELLA3-R                                | AGAATTCAAACCTAAAACACAG              |
| pNSP2-F                                  | CGGGATCCGTCGACAAGCTTTCCGTACATGTCACC |
| pNSP2-R                                  | CCGGAATTCGGTATAATTAAGTTAGGTGT       |



118 **Supplementary Table2: Sources and working concentrations of antibodies used**  
119 **in this study.**

| ANTIGEN          | ANTIBODY                                      | DILUTION | SOURCE             |
|------------------|-----------------------------------------------|----------|--------------------|
| HIS-MtDELLA1/2/3 | anti-HIS tag Mouse Monoclonal Antibody        | 1:2000   | CW Biotech, CW0083 |
| MBP-NSP2/IPD3    | MBP-Tag (6d3) Mouse mAb                       | 1:1000   | Ambmart, M40003    |
| CCAMK-S-tag      | anti-S-tag pAb                                | 1:2000   | MBL, PM021         |
| Flag-NSP2        | ANTI-FLAG® antibody, Rat monoclonal           | 1:4000   | Sigma, SAB4200071  |
| Myc-DELLA        | Anti-Myc Tag Antibody                         | 1:4000   | Millipore, 16-213  |
| HA-IPD3          | Monoclonal Anti-HA antibody produced in mouse | 1:4000   | Sigma, H9658       |

120

121

122 **Supplementary Note 1.**

123 Yellow indicates CYC-box

124 Green indicates NRE-box

125 It worthy to note that CYC-box (**TGCCA**T**G****TGGCA**) only found in promoter of NIN  
126 and half of CYC-box (**TGGCA**) was found in promoter of other nodulin genes.

127

128 > The promoter of *LjNIN*

129 TTTGTGGAGATGCATTGCGTCTATGAATTCACCAATGAAACAGAGGAGAATCTTTTTTTTC  
130 AATTTTCACGGCCTCAACTTGGAAATGTTAAAATATATTATCAAATCTTTTTTACAATTGTTG  
131 CCATCCACTTGTACTGGTAATTATATAGTATTAATTATCATAACGGCAATAATGTATGTAAT  
132 TGTATGTGTAATGTAGATGGTAGAGACATCTATTTCCGGATATCGTAGACATGTACGCAA  
133 ATTATATAAGTTTGCATTTTTAGGTACACA**AATTT**TGTACGAT**TGCCA**T**TGGCA**CGCAGA  
134 GAGGAGCCCACAAGAGGCGAGACCCTATTTCTCTGTCTCTTTAATT**AATTT**TGTTTAGA  
135 GTCAAGTTCATCATGATAATCTGCCACTATTATATAGCCGGTGTTCGCATAGATGGGTAG  
136 ATATAGATATATGTTATTAATTACAGCTGCTACAGCCACAGAGTACAAAGAAAGAATTGA  
137 AAGAAAGGCGTGAGACTTTACATTACATTATTAATTGATGATATAGAAATAGAAATAGAA  
138 ATAGGAATAGGTAGAGTCGACAGACATCCCGAATTACTAGCATTGTACCCTTCAATCCT  
139 ATAATAACAGGAATAATATAACCATTCTGTCTTTCTGAATTTACTCCCTTATTAATATTC  
140 TTTCTCAAGTCATGAGTAGTTAAGTTTTAGAAGCTTGTGTTTTGCTGTGTTGTTTCTTAC  
141 TCGAGAGGCAGCAAGCATATACTGAATACTACATTTATTTATAGAATATAATAATAATTTA  
142 CAGCTGATAACTATGAAAGAATATTTATTTATATGTTATATGTATTGTATATACTGCCAC  
143 GGTGAGGGGGGATTAGGGATATAAAAAGTGGAGACCACTCTTTGATTTTGCTTACACTTGT  
144 GGGTCTAGCAAGATACAATTAAGAAATTTGGGTTTTAAATAAGAGACTTGTGATCG  
145 CATGTTGAGGCAAGGCAATCATTTT

146

147 >The promoter of *MtERN1*

148 GTCAAAAGCTACGTTAAGCCATGCAATTATTGTACAACCTTACATGATTAACGAACTAATAT  
149 AAAATTATGTGCGAAACG**AATTT**TATTAAAAAAATTAATACATGATTATTGCAATATAGGTT  
150 GATTTAGTCGATAAAGAATTGAATCATAGCTTATAATGACGTGAATTCAACTAATGACTC  
151 TCGAGTCCCCTTGTAATCCAACCTACCCA**AATTT**TGTATACCATAAAAAATAAATTAGTATA  
152 TGGTTATTGCTAACATAAATATAAATATGCTTGAATCTCGAAAAGATTTTGAAAGATAACA  
153 TACTGTGTTGGATTGCT**AATTTAATTT**GATATAATAAAGTTGTGTCTTTTTCCCATATCT  
154 TCTTTCTTGCTAACGTGAGATCCATTGTGAACCTTAG**TGGCA**TGCAATATTTTAGCAAATT  
155 GTACTATATGCAAATCAATAAACAAAGAAGATAATGACAATGTCACACAAATCAAAGCT  
156 TGGAACCTGGTTGAAGAAGAATCTATTAATAAACACAATAATGATCAAATACGGAACAAAG  
157 TGTGTCGTTGGTGACGTGAGAAGAGGGCTACAACCTCAAAACAAACGTAGCTAGCACACAC  
158 ATGTAGGAATCTTTATTATTACATGTCTATCACTTTCCATTGCAAATATGTATAGAAATA  
159 GATATATTTCTGGGTTTTCTTCTTTAAGATTCAAACAAAGTATTCAA**TGGCA**GTAATTATT**AA**  
160 **TTT**GTAAAAAAGACAATAATTATTAATTAATATAAAATACT**TGGCA**ATTAATA  
161 **AAATTT**ATAACATATCCAACCTTTTTATTTTTCTAAGAAGATCAATGATAACAAAAAATCA  
162 ACAATTAAGATCCAATGATATGGTAGGGTGTGTTGAATGCAAAAGAAGAAAAAGAA  
163 CAAAACAGACAATTTATTGAAGAATGAATGATTAATATATTTTTCCGTAGAAGAGAGCGAA

164 TTATCTCTTTTAAATATTGTTTGGACTAAATAGTCTTTAATTTTATTTTTTTGAAGTAAAA  
165 TAGTTCCTTAATTATTCATAGGGACGTAATTGTTCTTTATCTTTTCGTGATTCAAGTATTCC  
166 AATTCCTTTTTCAGGACTAAATGTTGGAGTAATTTTTTTGGGTCCAAATTAGTCCTACGAA  
167 TTTTCCTTAGGGCTTAAATTGATCTTGACTATTATTATGATTATTATTATTATTATTAT  
168 TAGTTTTTTAAATAATATTGACATATGGTTGAGGACTTGAGGTGGCAATGACCTGTTTCAT  
169 CTTAGTGCTAAGCATTGCTTTAGTCTCTTTGTTTATGGGTGCTTGCTAGGATCATTTGGAG  
170 CCTCCAAGTGGCAGTTATTTGTGCCTCACCATAATAAATTCAACTGTTGACTTAACAAA  
171 AAGAGGGGAAGAAAGGGGACAAGAACTAGGGTACCCTAAATTCTACCTAACCTTAATGT  
172 ATTTTCTGTTTTTCTAAGTGATTGGTGATTCTTATTCTTTAATCTTTAGCGTGGCTTTAAG  
173 ATCATTTTATTGTAGGGTTGCTGGTATTCCACAATAATTTCAAATTTATCCAACCAAATAT  
174 TGCCATTGGATTTAGAAGAGAAGATCTGAATTTGACAAATTTGTTCTATATTATTGTA  
175 ATTTGCTTTTAAAATATTTTTTTATGTAGTCTATTGAGTTCGTTCCGTAATATTGACTTGAA  
176 ATTCGAAGTGTGTTTTTCTTCAAGATCTCATGTTTCGATTATCTTTGGTGTTAATATGGGTG  
177 TGTTAATTTAACTTCTTCAAAAAATAAATTGATGTAATTCATTATGATAACATTTATTAATT  
178 TTGCTTTTAAATTATCAATTGGAGATTCTATTATTCAAATTAATAAAAAATTTTATGATGCAAT  
179 TTACACATGAGAAATTTTCAAAAAATAAACATAACAAAAATACTATGCCATTAATTTATTA  
180 GTTAGGGACAGTATATTGTTAGAAATTTAGAAATGTAGGTCTTTAGTTACATAATAATATGCT  
181 TTTGAGAAGAAATAAAAAGATTAATAAATAAACTAGTTGATTTTGTGTTTGGCACATACAA  
182 CCAAATCCAAGCTTGCTGCTCCCAAACGACAGCTATAGGAGTGGTCATTCTGTTGAAAA  
183 ATTAAGGGCATCACCAATTGAAATTTCAAAGGTACCTTGTCATTATCATACCAAAAAATTAT  
184 ACTTATAATCCAAGACAATGTGCATGTAATATATTAATCCAATTTGCTTGCTGAAAAGCT  
185 TAACAATTTTTACACACATATATATAAAGTCTCATAGCTTGCAAATTACAACATGAAAA  
186 ATTAAGTAATAGCTAGCCTTCCATTATATCTTCATATCACAAACATCTTTTCCACTCAAATAC  
187 AATTTCTTGAAAAAACTTTGTG

188

189 > The promoter of *MtEnod11*

190 TTTCACACAGGAAACAGCTATGACCATGATTACGCCAAGCTTGGTACCGAGCTCGGATCC  
191 ACTAGTAACGGCCGCCAGTGTGCTGGAATTCGCCCTTGAGCTCAATATGTTCTTCAGGTTT  
192 CTACTTTCTACCCAGGCCAACGAGGCATGTTAAGATCCTTCGCATATCTGATTTCTTTTAA  
193 ATCTAGACACGATAATCTACGTGAGTTGCTTTCGGGATTTGAAAGATCTTTTTTGAAGGT  
194 TTGAGAACCATAAAAATTAAGGAGGTAAAGTGCTCGTGGTTGGGACACGTAATTGTCTGG  
195 TATTAGATCTTTCTTTATTGATATCACTTGCTAAAAGTATATAAGCAAATGGAGGAAAACC  
196 ACTACATGGGGACAGCCCAAATTTATTACGGAGGTCCAATGATTTTTTTAGCAAGTGTGATG  
197 TTAGAATTTTTTAAAACCATGATAACATTTTTTTTTTTTTTGGAGAAAAAACATAATAA  
198 CATTTTATTAAGGTATAATATTTTTATTACATCTTCAAATCTTAGAAATTTTACATT  
199 TTCTAAATCTTGTTATTATTGTGAATGTAATTTGTATCTGAGTAATGCAATCATACGTTTG  
200 AACTTCTATGATTTAAGGATATTTTCATCTTAAGTTTTTTTTGTCAAGTTTTTCTTGTTATGT  
201 TTAAATAAATAATAAAAAATTAGACACTTAATTTGAGGGTCATAATAACATAAAAAATAAT  
202 TGCAGGCCTAAAGCTATTATTTACCAGCCTTTTAAATTTGACCTGGCAATGGCCAATAAAC  
203 AAACGGGTCTTTCTTGAAAAAACTGTTTTATAGTTTGGCCATGGCAATAGCCAAGAATCTAGA  
204 TTTCTTAAATTTTCTTAAAACATTCTAAAAAGTAAGAAGTTTTTACATTTTGAATAATTATTC  
205 CACAACAGTTTTTGTGTTGATAATAATATCCCTACTAACTTTTTGACATTTAGTGGAGT

206 GATTGTAGAGAGATAAAAAAAAAAAAAAAAAAGTTTTGTATTAAGACCTTACACTCCCATTGA  
207 GGTCCCAAAGTAGTATAAACCTAAGCATTCCCTATATGTTATGCACACTAAAATCACTAC  
208 CTA  
209

210 > The promoter of *MtNIN*

211 AAAAGTAGGTTAGACTAAACAATATTTTACAAGGTGTATACTTGGTTTGATAAAAATAAAA  
212 AAATAAAAAAATACAAGGTCCTTTAATAAAAAATGGTGAAAGTCTTTTTTGAAAACCTTAT  
213 TATGGTATGTATCCCAACTTAAGTGTTTATTATTTATTTTGGTTAATTAAATGTTTATTTT  
214 TATTTTTTTTTGTCAATTAGTCTAGTGTTAGACTCACACACATTATGTGTGGAGAAGTGG  
215 AGAATCTGAGGTTGCAACTCCGGTCCTTGCACAAATTATCTCTGGTAGCTACCAACTGAGC  
216 TACACTTACGAGACAATTAAATGCTTATTTAACATTATTGTTTTTAAATAATTAATCCATT  
217 TAATGACCAACGAGCTAATAAGTCAATGAAATAAAGTTATATTTTGATATTAGCATGGTA  
218 ATCAAAAAGTATGACTTTGTATAACAACTATTTCAATTATTTAATAATAATAATAATA  
219 ATAATATATTCAAATATGCCAATAAAAAATTACTGTGACCTAATATGCTTAAATTAATAAAAAAT  
220 ATTTTCACTAAATAAGTTGAAAATGTTTAAACAAGGTATAATGTATAATATAAAGAATA  
221 ATTATAAAAAACAATTATTCATAGTCGGTCTAATAATTAAAGAAATTTTGTGGTC  
222 TGAAATCTGATATTTGTTCTTAACTAAATAGAGTTGCTTTTTTTTTTTTTAATATAGTTTGA  
223 GTCTTGCTATTTAACAAAAAAAAAAAAAAAAAGTTGGCTTGCGCTTGAAGTAGGCTCAGAC  
224 ATAAGACTATGTTGATTGATTAACCTTCTCCATCCCTAACACGATTGTGTCTTCACAA  
225 ATATTAACAAAGTATTTATTTGTTCTTGTGAGCTTATCACAATTGATAGGAACAACGCATA  
226 ATATATGCAAAGTCCGAGGTACGAACCCAGACACCAACGGCGAAAAAAGAAAAA  
227 TCTTATTTATCGATTGTTCAACATCGTAATTAATTCAAAAAGAGCTTATTTTTTATTTGAT  
228 TACTTATCAAAAAGTGATTTGCATATGATTTGTTTTAATTTGAACACAATTACTTTTT  
229 TAATCAATATCTACATCTAACTATTTTACATCTATTGTAATTAACAAGAAACTAGCTAT  
230 GATGAGAACATAAACTAATATAAATTATCAACAATTAATTACAAAGTTTTTCAATT  
231 TGATATTATATTTAAATGTGAAAGGAAGTAATAGGTAGTTAGGGAGACAGAGATCCCAA  
232 GTTACTAGTATGATTTTGTACCTGCTTACTATTAATTGAATCAACGGCAAGAATAATAT  
233 ACCTATCCTGTCTCTTCTGTCTCTCATTGATTGAGTTCATATAGTACTAGTACATGTTGA  
234 TAGTATATATGTTTCTATGCATGTGTTGCTCAGCACGAGTGTATGTTATGTTATGTTATG  
235 TTATACAAGAAGCAGCAAAAACACATATAGAAGAAGGGAGTATAATATAATAAAAATAAA  
236 ATAAAATAATTTACAGCGCTGCTAATTGTGAAAGAGAATATAGAGATATAAAATATAGAT  
237 ATAGGCCAGTCGCTGCTTTAGCTTACTAGTGGTCCAACCTAACTAAAAATATAAAGAAA  
238 TTGAAATTGCATTTTTGGTCATTAATAGGAGACCTGTTGATCATCTAAATATATCATATC  
239 AATTAAGCAAAAGCATTGACGCAAGGCTCTGCCTGCACAAAATACTACTTCTTCTTAATCA  
240 TTCATTCACTCACTACAATAATTAGGTTAATCTCTATCTATCTGCTGCAGCTTCACACA  
241 CATCACATACCTAATTATTTCTTTGTTTCTTTAATTTCCGTACTTATTATTCTAC  
242 GTACGTGTTCTCCTCAACTACTTAACTTAATTAATAATTGACTCTTCCCTCATCCCTTCT  
243 CTAATATATATCATGACATGAATGATATCTTCTGATCTTTTTATATAGGAGGATCTGAGAA  
244 ACAACTTAAATTATAAGG

245

246 > The promoter of *MtDELLA1* 2030bp

247 GAGTATGCCAAAACACGATGACCAAAAAGTGTAATTAAGCCATATATTTAATAGATGCCAT  
248 TAATTTTGAGATATTACATATGTTTCGAACTAAGCCGAGACCAGACACAAGACAAACTTC  
249 AGCTAGGGAAGGTACACACCAAGGTGCTACATCATTTGACCAAAAAAGAGCGCTACACCG  
250 CTAATAATACTAGCGTACTTTAACCCACTTAGACTGGTTTGGTAGTATTGATTTGAGACTT  
251 GTGAGTGTACTTCTTCTCAATGTTACAAATTCGATTTTCCCCGGAGTCAATTTGGACGGAT  
252 TAATTTAGTTTTTTCAAAAAAAAAAAAAATACTAGCATACTTTTCCATCAATCAATCACCACA  
253 TGATCTACATCACGCAAAAATCGATTTGTAGATCACACAAAAATATTTCAACGACTTCAAT  
254 GAAATTTACTTTGATTATCTTAAATCCCCGCTTATAAAATGTTAGTTGCAACATAAGAAAG  
255 ATAGATTTCTATTTTAATAAAAAATCTCACTCTACTCAATCATCAATATTTGTCCAAACAAC  
256 ACTTTTACTCTATATCGTACCGTTGAACATCGATGACCACCTCAACGAACCTCCAAATCAA  
257 ATTTTATATCCAAAAACATATTATTGTTGATTTCAACCTTAATTTCTAAATTTCAATTCTAA  
258 TTTCTCATCCTAATACGATTTTTTTAGGGGTAAAGTGATTGCTGTGGTACTAGTACAACA  
259 CTAATGCTAATTGTACTAATCTCAACGGTAAAGCCCCAAACTAAAGAGAAATGATATTTG  
260 TACAACACTTTGTGATAATTTTGTAGACAACTTTTCTCTCATACTTACATTATATTTTACC  
261 CTCTCTCTTTCTTTTTCTCTCTCCATTATTTTTGACCAATGAAAAGAGAGAAAAAGAAGATT  
262 TTCAAATAGGTTGTACCAAATAATTGTTCAAATATCATTCTCCAAACCAAATGTA AAAAG  
263 TGTGAGCAAGAATTGGAAACCACGCGCTATCAGAACGCGCGTGAATGGGCCAGGACAGA  
264 GGTGGAGCCCATGATCATTCTCGGTCCCCAAGACCCTCAATTGATGAAATGTACGGCCAC  
265 CTGATATTTCTAGTGTGTATGGTTTCTGTGCTATGCACAAGCTGTACACTATCATGGGCAT  
266 CTTTTCTTCTTACATTACGGTACTGTCACGCCCTCTCTCTCCTTTTAAATTAAGCATAT  
267 GTTTGCTTTGTGTTAATTTGTTTTAAATAAGTTAATTTAATATTTATGAGCTTAACTCAATT  
268 GATAGAGACAATGTATAATATTTATAAGGTTGAATTTCAAACCTCAACCACAAAAA  
269 GATTGATTTAGATCAAAAGCTGTTTAAAATGAGTTGGAGATAAAGTAATTTAATATGTAA  
270 AGTTGAGTATTTAAATCAATTATAAAAATTA AAAACCTTAATTTTTAAACTTTTTTGAGTCA  
271 ATTAATTTTAAACAACAAAATCAAAGGAATCAAATGTATTAGAATCAATTCTAAATTTCTTAA  
272 AATCAATTTTGATCTTTTAAAAGTTAAATCAAATATACGCTAATCAAAAAGAAAATGAGAT  
273 GAATATTAATAACCAATATCGTAATAACCAAAAAAAGTTATACACTAAACCTTTTCTTTT  
274 TCATTCTCATTTCCTTTTATTACACCACCACGCAAAATTTACTCACCCCCACACTCTAC  
275 TACTAAAATTTCCCTAATGTAAAACTTTTATCTAATTAATTTCTCTCCCACAATTATCAAC  
276 AACCTTTTTATTTTAGCAAAAAAGCATAACCAAAAACAGAAAAGAACTAGTTGAAAAA  
277 AATTCATTATTATTATGGTTTCCGTTCTTCTTATCTTTTTTCATTTTCAATCTCCTCTCTCT  
278 TCTTCTCCTTTCTCTGTCTCAACCCCTTTTCTCCATTCTTCTAAACTTCAAACCATAAAC  
279 TCAAAAACCCCATTTTGCTATGACCCAACCTCAAATCTAAATCAAAATCTATTCACTTCA  
280 CCAATTTAATCAAC

281

282 >The promoter of *MtDELLA2* 1121bp

283 GAGTATGCAGTCATAAAGTACATAAGTCTTTGATAATTGTGTGTCCATAAAGTAAATTCAT  
284 AGGTTAATATCTGCAGAAGGAAGAAGAAACAAGGCTTAAGTTTGTGAATTTGCAACTTAA  
285 TTAATGATATAATTTTTATAATGCAGGAAATGTCATATCTATTAGTTGCAGCATGTTAAAT  
286 AGATTATATCATAGACCTTCTGCATGAAGTCAGTGGATCACATTGACTACAAAGTTATGT  
287 GATATATATCAATTTTCTACTACTATGACATTCTTATCTTGATTTATTTCAACAGCTTGATT  
288 TTTAATGTTTGATTTTTAGTTTTACCTTCTTTGTAAAAAATTTATCTTGCTCCTTGTTGATAA

289 ATATGAATGAAAAGGCTGCACATGACAAAACCATGATTTATTTGGCATATATTCGTTTCATT  
290 TTCTTGTGAATAGAATTTTTATGACAATAGGTACAATATACTACTTGAAGAACTAAATATA  
291 TGATTTTTGGTAAGAAAAAATCTAAATTTTTAAGTTTAGGGAACATTTTGCACATAAGTG  
292 CAAAATTTTCGGGGTATTTGATCATAACCGTAGACAGTTAACAGAAAAATTTGACGGAAG  
293 GATAAATTGATTAGCGTTATACAATTTTTAAAGAGATAATTAATAATTTGTTAATTTCAAAG  
294 ATAATTGACGAACTTACAATTTTTAGATAGAAAATTGACTATTTACTCTCACAAAAGTCCA  
295 ATTAAGCCTACAAAATAAAGAGAGTTTATGGCTCGTCGTCTGACAAAAAGCAAGAAATG  
296 GAAACAAAGTAAAAACATAAATGTATATTTTGGCGGATCTTATCTGTTACTGTTAGAACC  
297 CTGCCAGCCCGCCTTTTGATTGGGTCTCGAGCCTGCCACGAGCGTTTTTCTACTCTCTTTCC  
298 TTTTTTTATTTTAAATATTTTATTTAATTTATTATAAAAAATAAAAAAAGATTTGGATATA  
299 TATGAGTTTTACGGGTATATGATTGTGTTGATGAAAAGAAAGAAGGTTAGAACTTAGAAAC  
300 ACCAGTGAAAAAGAGTCACAATCAGAAAACAAAACATAGAAAGTGTATTGTGTGTGTGTG  
301 AGAGAAAACTGAAAAAGTGAAAG

302

303 >The promoter of *MtDELLA3* 2431bp

304 CGTAATGCCTGAATCTCTACGTCTTTGTGAGAACGATGGAGGGTATAGATAAATTGGTTTCT  
305 TTGTTTAAATTTGGTTGAATTGGTCCTTCTCAATTTTCATGATAAGAAATGTTCTTATATAGT  
306 GCCAAGGCAGGCAGGGTGAAAAATTATTTAAGTAGCTAAGTTGTGAATATCGCAATTA  
307 ATTAGTATTTAAATCAACTTTTGTCTGATTACACTAATAAACACATTATTTATTGTGCAAT  
308 ATGTAACCTTCATATGAATCATAATGGGTGCTATAGCTTTTATATTGATTAACATAAATTA  
309 TACCTTAAGATGCTTTGTGTGACACATGGTACTACAGGAATATTCTAGTTACAATGACGT  
310 TCTACTTGAAGGAAAGACTGTACTTTTAGGTACCTATAATAATGCAAATTTAAATAAGGG  
311 GAATTAATCGCTTTAGTCCCTAAATGGGAAAGGACTAATCATTTTAGTCTCTGAATGTAGA  
312 CTCTGTTGGTCAATTTTAGAGACTAAAGTGACTAACGGAGTTTACATTCATAGACTAAATT  
313 GACTAACGGAATCTGCATTCAGGGATTAATTGACTAACAGAGTCTACATTTAGGGATTA  
314 TTTTATAATTTATTGCAATTCAGAGACTAAAGTGACGACTCATTTCCTATTCAAGGACTAA  
315 AGTGACTAATCTCCTTTAAATATTTTTTTTTTATTAAGAGTAAGTAGGTACGTAATTAAGC  
316 AAGTAGGGTCTTAGCAGAGACAAAAATCAAAGGGCCACTTGTTGCAATAGAAACATAAA  
317 CAGGAAAAAGCTACCTACAATTAAGTTGTAGAAAATTTGATCAGACTAAATCAACCTTTA  
318 CAAATGATTATAGGAACATAGGCTAAGATAAGACAAGCATATACAAAGAGAGATACACA  
319 AAGTGACTTTACACAACAGCATCTTAGAACTTTACAAGCTTTTAAATATGATGAGACTAATT  
320 GGGAGACTTTGACTTTGGATAATGACAACTTAACATTGAGTTCATTACACTCAAAAAAG  
321 GTTTTCAAATTTGGGCAAGTGTTATATTTTAAACCAATTTACCACTTAACTTGAAATCCTAAT  
322 TATTTGAGGCAAAAGATAGTGACAGTGGGACTAATATTTTACCAAAAACAGTTAAGCATT  
323 CTCTAATAAGTGAATCGGATGGAATGATCACAATAAATAGATAATGTAGAAAAGTAGAAAA  
324 TTTAAATATGACCCATCATCAACCTCTCTGCCTCATTGGGTCGGGTATTGATAATTACATG  
325 TCCAAAAACTATAAAGCACGGATACGGACATGGACATCGGACAGGATACAGACTGAC  
326 ACGTCGATACAACACAATAAATTTGATAAAATCACATAATTCAGTGTAAATTACAAGT  
327 GTCAGTGTGGTATCGGTATCGGACACGACACGTGTCCGACACTGCGACATGTCTAACCCCT  
328 AGAAGTGTCCGTGCTTCATAATCAAAAAATATAATGTTACATGAGTTGATTTGATGTAAGC  
329 TAAATTTCTCAATGTGTAGGCTATGAAGTACAGGTTATCTGTAGTATACCGTGGGTGCTAA  
330 ATGAAGAAAAGTAAGAAAAACAAGCTCGTGAAAGCAAGGTGCTGTCAAGTGTGTCAGGGT

331 TTTTCTCATCTATGAATTGAATACAAATTATCACTTGCTAGGTTTAGCAGGTATAAGATA  
332 GGAAATAAATTCAAAAACAAATTGAAGAGTAGCATAACATAGCATGTGAAATAACAGTA  
333 TTCCCAAGTTGGAATTGGAGTAAAATTGGAATCAACATGTTAGCACATTCCTGTTTATATA  
334 TTATTTGGCATTGTTTGGTCAGTTAAACTGTAAACAACAGTAATACTTTACACTGTTTATA  
335 TATTTTACAGTTTGTGGTATTATTGTACAGTTGTACTATAGTTTCTGGACCCTGAAAATCG  
336 TAACAAATCACAATGGTTAATGGTGGTAGTGTGGTACTACACTGATAGTAGTAGACCCAG  
337 ACCGACCCAGGAGGAACCACTTGTTGTACCCAAATCCCAATATTGGATAAACAGCATCTA  
338 AATTATCAAAAAGCCAACCTTGGTACCTAAGGCTACTAAAAATTGAAGGCACACTAGCGTG  
339 ACATTAGGGTACCTTTTAAAAAAGTTGAAATTATATAAGTAGTTGTATCAATCAAATATG  
340 ATGTGCTAGCACTGCAGATAGCTACTCAACACAAATTAGTAACCCATCGTGCTCATGCATT  
341 TTACAACCTAGCTTCTCTCTTAGTTTCTCACACATCACTTCTTTATTTCTTCTCCTCTTTT  
342 TTCACTCTCCTAGCTTAAACTCAATTATAAACACACACACTTCTTTAGATGCTATCATAC  
343 TTCAACTTTGCTTCCACAGACTAACGCTTATAAGTTCAAAAACCTGTGTTTTAAGTTTTGAAT  
344 TCT

345

346 >The promoter of *MtIPD3* 1047bp

347 AAGTGGAGTCAAAAGAAATAGTTTATATGAAATAATAATATCACAAAGTCACCTACACATA  
348 TAAATATTTGTATAAAGTGATGGAACACACATAAATTTTCATTAGATAAAAAACGAATAA  
349 CACTTGTACGTAACATAAATTTATACGACATGACTAGACTTTAATGTTTTACATAACAGA  
350 ATAAATTTTCACAGTCTATAAAGAATTTATGGACGTGAGGTGAACAAACATTGCTGAAA  
351 CATGCTTAGCAAACAATGAAAGCACCACTTAACAGCTTCTATTTTAATACAAAAACA  
352 ACCAATCAATGTTCCACAATATCCCTTTCATAACACCATCATCTAATTGCATCACCTACGG  
353 CATTTTATTTATTTAATAATATCAAAAGGTGACCAAAATTGTCATTAATTAATCAAAATG  
354 ACCCTCTTGCTTGATTCAAAAGCTACAAATTTTTTTCATTTTTAAACCTGTCCATTAAATT  
355 TCCACACACGGTTTTCTAACCTTTGAAGATTAATTTTTAACATCACAATCTTTTCTTTTCA  
356 TTGTACACAAGAGACAAATGAATGGTACATGGAATCTTTTGAGTATTTTTTCACTCTTAG  
357 ATGTCATAGCCACTGCTCTAATATTTAGTATTTATTAATTCTATTGACAAAAACAAAAATC  
358 AGAAAAATATTTACTATTAGTAAATGCCAAGTTCTAAGACAAAGTTTATTTATCTATATGC  
359 AAGATTTCTTCAAGTTTCACGTGTAATTGTTGTAGGAAGCTATTCCTTAACTGTTTCAT  
360 GTTAATTAGTTACTACATGCTTTTGAATAAAACAGTTCATAAAGTCTTTCTTTCATTTCT  
361 TGGTTTTTGAGAAGAAAAAATAGTTGCTAGCTTAGGTTGAATTTTCATTGAGTATTCAAAA  
362 TTCTCTCCCTGGTTTTTGAGAAGGGTATTGTGATGAATAAAGAATTCAGCTGAAAATTCA  
363 TTTATGAAACCTGAAAGATCTTAGCCAAAAACCTGTGTTGAAAAATAAGTTCAAGCATCATT  
364 CAAGTGTTTC

365

366 >The promoter of *MtNSP2* 1463bp

367 AAGCTTCCGTACATGTCACCTATAAAAGGTCAATGACCTCTAGTGTAGGTAGGTTCTCAG  
368 TTGTGATTAACCTTCTAGAATCGCCTAAAAGTCTCACTGACTTGACTGTTTCGAGTCCTTAT  
369 AGGTACACAACCTCTCTCGTGGATTACTAACGCCATCTTAAACCGGTTCTAACCAACTCTCG  
370 GTTTCGCTTCAGGTCCACTCTAAATCACTGACACCGTCTGTAGGAATCATTTTATAATATT  
371 TTTCATCATTCTGAACATTTTCGATGGCTTGAACAAGAGAGCAGCCACTTCAAAGACGAG  
372 GACTTGTGATCATGCTCAAAAGTATTTAATTAAGAAGGAAAAATGCTACTTTCAGCGAAAC

373 TTTTTTTCGAATACTTCACGACTTGCAAATTATAACTGGAGTAGGTCCTCTTTCTTTTCACT  
374 TCCACTTCCATGTTTTCCGCTTAATAGAATATCAACGATCCTAGTTGATTTGCAATCAATTC  
375 GTGAGAATATTTCTGGCTGCAAGTAGCAGCACTCAATTAATAAATTAAATATTAGAAACAA  
376 AAATAAAAAATAACATCTACTTTATACCGTCTAGCCATCAGTCATATGGGTGAAAAAA  
377 ATATATACAACTCAATTTGAAGACTCGTTAAGTGCTAATCTCATTTTCCTCAAAAAAAAAA  
378 AAGTGCTAATCTCATTTACTTGCAAATTAACCATCAAATTTGTCCGATCTGAAATCATATT  
379 GGAGCATAAAGAATTGATCTGATCAACATTGAAAACGAGTTATAGTTGTGTATAATATAA  
380 CACTCAACTTGTCCATTACTCACCCCTGATTATTAGTTCCATTATGTGATGAGACTTAAATA  
381 ATAAAAAAAAAAAAACAATATTAATTAACAACCTCTAAATATACAGACATTGATTATTTGAGA  
382 AGTCAAATGGATAAACATCAAACCAAACACTATGAGCTGGGTGAGATAGATGGAAACTTGA  
383 GGCTCGTAAAAAGTTATGTATAAACTCAAGGGGCTTATGAGCAATTGAAAAAAATTACA  
384 TAGGTATAGTGACTATGCTAATCTATAAAATTAAAAAAAAAAAAAATCAAGAGCAAGACA  
385 AAGTTGGAGTATAAATAAAAAACGGCAGTCATAATTATTTACGAATATACTCTTTTATAAG  
386 TTATTTATTTCAATAAATATTTAAAAATAATTTGCATTACATCAGGTAGGAGGTCATGTT  
387 GTTAGTGACAACAGCGCACATAACAATATCCCTTAACTTACCAATCAGTTTTTGGACTTC  
388 CACTGTCTCATCCTCTGAATCCTTCTTCTCTCTCCATCACCTCTCAACCCCTTTATAAAC  
389 CTCTCCCATAACCATTCACTCTCCCTCACACACAACAAACCACAACCTCAATAATAATATA  
390 CACAAACCTAACTATATATTATATTTTGCTGATCTCTTTCTCTTAAACACCTAACTTAATTA  
391 TACC  
392
